1 Title:

2 The two-component response regulator OrrA confers dehydration tolerance by regulating *anaKa*  
3 expression in the cyanobacterium *Anabaena* sp. strain PCC 7120

4

5 Authors:

6 Satoshi Kimura<sup>1</sup>, Miho Sato<sup>2</sup>, Xingyan Fan<sup>2</sup>, Masayuki Ohmori<sup>1</sup>, Shigeki Ehira<sup>1,2\*</sup>

7

8 Affiliation:

9 <sup>1</sup> Department of Biochemistry and Molecular Biology, Faculty of Science, Saitama University,  
10 Saitama 338-8570, Japan

11 <sup>2</sup> Department of Biological Sciences, Graduate school of Science, Tokyo Metropolitan University,  
12 Tokyo 192-0397, Japan

13

14 \*To whom correspondence should be addressed:

15 Shigeki Ehira

16 Department of Biological Sciences, Graduate school of Science, Tokyo Metropolitan University,  
17 1-1 Minami-Osawa, Hachioji, Tokyo 192-0397, Japan

18 Tel.: +81 (42) 677-2496; Fax: +81 (42) 677-2496; E-mail: [ehira@tmu.ac.jp](mailto:ehira@tmu.ac.jp)

19

20 Running title:

21 Dehydration tolerance in *Anabaena*

22

## 23 **Summary**

24 The aquatic cyanobacterium *Anabaena* sp. strain PCC 7120 exhibits dehydration tolerance. The  
25 regulation of gene expression in response to dehydration is crucial for the acquisition of  
26 dehydration tolerance, but the molecular mechanisms underlying dehydration responses remain  
27 unknown. In this study, the functions of the response regulator OrrA in the regulation of salt and  
28 dehydration responses were investigated. Disruption of *orrA* abolished or diminished the  
29 induction of hundreds of genes in response to salt stress and dehydration. Thus, OrrA is a  
30 principal regulator of both stress responses. In particular, OrrA plays a crucial role in dehydration  
31 tolerance because an *orrA* disruptant completely lost the ability to regrow after dehydration.  
32 Moreover, in the OrrA regulon, *anaKa* encoding a protein of unknown function was revealed to  
33 be indispensable for dehydration tolerance. OrrA and AnaK are conserved among the terrestrial  
34 cyanobacteria, suggesting their conserved functions in dehydration tolerance in cyanobacteria.

35

## 36 **INTRODUCTION**

37 Cyanobacteria comprise a diverse group of bacteria characterized by oxygen-evolving  
38 photosynthesis. Their photosynthetic ability enables them to inhabit almost all illuminated  
39 environments. The habitat of cyanobacteria is not limited to aquatic ecosystems, but it extends to  
40 terrestrial ecosystems including extremely arid environments such as deserts (Pointing and  
41 Belnap, 2012). Some cyanobacterial species belonging to the genera *Nostoc* and  
42 *Chroococcidiopsis* are present in dry areas, and they exhibit high tolerance to desiccation (Singh,  
43 2018). For example, *Chroococcidiopsis* strains isolated from deserts could form colonies after 4  
44 years of storage in a dry state, and the terrestrial strain *Nostoc commune* was revived via  
45 inoculation into medium after storage in a desiccated state for approximately 90 years (Lipman,  
46 1941; Fagliarone *et al.*, 2017).

47 Loss of water from cells induces various stresses and damages various cellular  
48 components including proteins, membrane lipids, and DNA (Potts, 2001; Singh, 2018).

49 Desiccation-tolerant cyanobacteria adopt multiple strategies to survive harsh environments  
50 during desiccation. *N. commune* cells are embedded in extracellular polysaccharide (EPS), which  
51 protects cells from desiccation (Tamaru *et al.*, 2005). In the aquatic cyanobacterium *Anabaena* sp.  
52 strain PCC 7120 (hereafter *Anabaena*), EPS excretion was increased by overexpression of *sigJ*,  
53 which encodes the sigma factor of RNA polymerase, and the mutant displays higher dehydration  
54 tolerance than the wild-type strain (WT) (Yoshimura *et al.*, 2007). The accumulation of  
55 compatible solutes such as trehalose and sucrose, which stabilize the proteins and cellular  
56 membranes of dehydrated cells (Tapia and Koshland, 2014), represents another strategy of  
57 desiccation tolerance. *N. commune* and a *Chroococcidiopsis* strain accumulate trehalose and  
58 sucrose in response to dehydration, salt and osmotic stress (HersHKovitz *et al.*, 1991; Sakamoto *et*  
59 *al.*, 2009). *Anabaena* also utilizes both sugars as compatible solutes, and disruption of trehalose  
60 synthesis genes decreases dehydration tolerance (Higo *et al.*, 2006). Moreover, *Escherichia coli*  
61 expressing the sucrose synthesis gene *spsA* from the cyanobacterium *Synechocystis* sp. strain  
62 PCC 6803 (*Synechocystis* PCC 6803) accumulates sucrose within cells and exhibits a drastic  
63 increase in survival rate after dehydration (Billi *et al.*, 2002).

64           Oxidative damage caused by reactive oxygen species (ROS) is one of the most  
65 deleterious effects of dehydration (França *et al.*, 2007). ROS generation is increased by  
66 dehydration, resulting in lipid peroxidation, denaturation of proteins through oxidative  
67 modifications, and DNA double-strand breakage. Antioxidant defense systems that suppress ROS  
68 generation and scavenge generated ROS protect cellular components from oxidation (Singh,  
69 2018). Because most antioxidant defense systems are proteinous, avoidance of protein oxidation  
70 is a key factor for desiccation tolerance (Daly, 2009). Desiccation-resistant bacteria display lower  
71 oxidative modification of proteins than desiccation-sensitive bacteria during dehydration  
72 (Fredrickson *et al.*, 2008). *Chroococcidiopsis* sp. strain CCMEE 029 is highly tolerant to  
73 desiccation, and it does not undergo protein oxidation after 1 year of incubation under dry  
74 conditions. Contrarily, *Synechocystis* PCC 6803 exhibits substantial protein oxidation, and it is

75 incapable of surviving under the same conditions (Fagliarone *et al.*, 2017).

76 *Anabaena* is a model organism of bacterial cellular differentiation (Flores *et al.*, 2019).

77 It has been also used to study the molecular mechanisms of responses to stresses including

78 dehydration (Ohmori *et al.*, 2001; Wang *et al.*, 2002). Close relatives of *Anabaena* such as the

79 terrestrial strain *Nostoc* sp. HK-01 exhibit high desiccation tolerance, and *Anabaena* itself

80 displays moderate dehydration tolerance (Kato *et al.*, 2003; Singh *et al.*, 2013). Because genetic

81 engineering cannot be performed in terrestrial *Nostoc* strains, *Anabaena* serves as a model

82 organism for investigating the molecular mechanisms of desiccation tolerance in the terrestrial

83 strains (Yoshimura *et al.*, 2007; Xu *et al.*, 2020). In *Anabaena*, *orrA*, which encodes a response

84 regulator of the bacterial two-component regulatory system, was identified as a regulator of *lti2* in

85 response to salt and osmotic stresses (Schwartz *et al.*, 1998). We previously indicated that OrrA

86 regulates the expression of *spsA*, *susA*, and *susB*, which participate sucrose synthesis, in response

87 to salt stress (Ehira *et al.*, 2014). Sucrose accumulation under salt stress conditions is lowered by

88 the *orrA* disruption, and intracellular sucrose levels are increased by *orrA* overexpression (Ehira

89 *et al.*, 2014). In this study, we analyzed the global effects of *orrA* disruption on gene expression,

90 observing that OrrA is a master regulator of dehydration and salt stress responses in *Anabaena*.

91 Moreover, among hundreds of genes regulated by OrrA, *anaKa*, which encodes a protein of

92 unknown function, proved essential for dehydration tolerance in *Anabaena*.

93

## 94 **RESULTS**

### 95 *OrrA is a major regulator of salt stress response*

96 Sucrose synthesis under salt stress conditions is regulated by OrrA in *Anabaena* (Ehira *et al.*,

97 2014). The functions of OrrA in global salt stress response regulation were investigated by

98 transcriptome analysis. The gene expression profiles of WT and the *orrA* mutant strain DRorrAS

99 were compared between cells subjected to salt stress (50 mM NaCl) for 3 h and cells before stress

100 treatment. The transcript levels of 298 genes were increased at least twofold by salt stress in WT,

101 while those of another 1,358 genes were decreased (Table S1). Three genes involved in sucrose  
102 metabolism, namely *spsA*, *susA* and *susB*, were upregulated by salt stress as previously reported  
103 (Ehira *et al.*, 2014). The upregulated genes included *mth* encoding an enzyme for trehalose  
104 synthesis (Higo *et al.*, 2006) and *anaK* genes (all4050, all4051, and all5315), which are  
105 predominantly expressed in cyanobacterial resting cells called akinetes in *Anabaena variabilis*  
106 (Zhou and Wolk, 2002). Genes encoding proteins that prevent ROS generation, such as *hli/scp*  
107 genes (asl0514, asl0873, asr3042, and asr3043) and *dps* genes (all0458 and all1173), and genes  
108 that detoxify ROS, such as *katA* and *katB*, were also upregulated (Howe *et al.*, 2018; Tibiletti *et*  
109 *al.*, 2018). The downregulated genes included genes involved in photosynthesis (*psa* and *psb*  
110 genes) and carbon fixation (*rbcLXS*, *prk*, *ccmNMLK*, *ecaA*, and *cmpABCD*), and genes encoding  
111 components of the phycobilisome (*apc*, *cpc*, and *pec* genes). Moreover, the transcript levels of  
112 genes involved in transcription and translation (*rpl* and *rps* genes, *rpoA*, *rpoC1*, and *rpoC2*), and  
113 ATP synthesis (*atp* genes) were decreased. The suppression of cell growth under salt stress  
114 conditions leads to downregulation of these genes (Ehira *et al.*, 2014).

115 In DRorrAS, the numbers of genes upregulated and downregulated by salt stress were  
116 decreased to 71 and 51, respectively (Table S1). Meanwhile, 37 genes were upregulated in both  
117 WT and DRorrAS (Fig. 1), but the degree of upregulation was higher in WT than in DRorrAS.  
118 Temporal changes in the expression of salt-induced genes were examined by quantitative reverse  
119 transcription (qRT)-PCR (Fig. 2). In WT, *mth* expression was induced within 30 min after NaCl  
120 addition, with the *mth* transcript level increasing approximately 800-fold after 60 min, but its  
121 induction was completely abolished in DRorrAS (Fig. 2A). The induction patterns of two *dps*  
122 genes (all0458 and all1173) differed from each other, but both genes lost salt-responsive  
123 induction by *orrA* disruption (Fig. 2B). There are four paralogs of *anaK* (*anaKa*, *anaKb*, *anaKc*,  
124 and *anaKd*) in *Anabaena* (Zhou and Wolk, 2002). All *anaK* genes were induced by salt stress,  
125 which depended on *orrA* (Fig. 2C). These results indicate that OrrA is a major regulator of salt  
126 stress response in *Anabaena*.

127

128 *orrA* is necessary for dehydration tolerance

129 OrrA regulates the expression of most salt-responsive genes, whereas its disruption does not  
130 affect growth under salt stress conditions (Ehira *et al.*, 2014). Expression of *orrA* is induced by  
131 not only salt stress, but also dehydration (Higo *et al.*, 2006). Moreover, many genes upregulated  
132 by salt stress, such as *mth*, *hli/scp* genes, and *dps* genes, are also upregulated by dehydration  
133 (Higo *et al.*, 2006). To investigate the effect of the *orrA* disruption on gene expression in response  
134 to dehydration, gene expression profiles were compared between WT and DRorrAS after 3 h of  
135 dehydration. In WT, 493 genes were upregulated by dehydration, while 1,307 genes were  
136 downregulated (Table S1). Among the upregulated genes in WT, 156 genes were also upregulated  
137 in DRorrAS, but the extent of upregulation was significantly lower in DRorrAS than in WT (Fig.  
138 1 and Table S1). Salt stress and dehydration increased the expression of the same 239 genes, only  
139 23 of which were upregulated by both stresses in DRorrS (Fig. 1). *spsA*, *susA*, and *susB*, which are  
140 involved in sucrose metabolism, were also induced by dehydration under the control of OrrA  
141 (Table S1). The intracellular sucrose level in WT was increased more than 80-fold after 9 h of  
142 dehydration, whereas the level was twofold lower in DRorrAS than in WT (Table 1). Thus, OrrA  
143 plays a principal role in regulating gene expression during dehydration in *Anabaena*.

144 To investigate the physiological role of OrrA in dehydration tolerance, growth ability  
145 after dehydration was analyzed. *Anabaena* filaments grown in the liquid medium were collected  
146 by filtration, and then filaments on the filters were dried in an incubator. After the indicated times,  
147 filaments were resuspended in liquid medium and incubated for 3 days. The weight of the filters  
148 decreased during the first 8 h of incubation before reaching a plateau, indicating that all water had  
149 evaporated (Fig. 3A). In WT, filaments were capable of restarting growth even after 24 h of  
150 incubation on the filters (Fig. 3B). DRorrAS filaments were able to regrow after 6 h of incubation  
151 on the filters, but their growth was severely impaired after 7 and 8 h of incubation (Fig. 3B).  
152 Moreover, DRorrAS completely lost its ability to grow after more than 10 h of incubation on the

153 filters. Thus, *orrA* is necessary for survival under dehydration conditions.

154

155 *orrA is also involved in cold acclimation*

156 OrrA was originally identified as a regulator of the salt and osmolyte responses of *lti2* (Schwartz  
157 *et al.*, 1998). In this study, we confirmed the OrrA-regulated *lti2* expression in response to salt and  
158 dehydration (Table S1). *lti2* is also known to be upregulated under low temperatures (Ehira *et al.*,  
159 2005). In addition, low temperature-responsive genes, such as *alr0169*, *alr0803*, *alr0804*, and  
160 *alr1819*, were under the control of OrrA (Table S1). Hence, we analyzed the effects of *orrA*  
161 disruption on cold acclimation. *orrA* expression increased within 30 min after the temperature  
162 was decreased from 30°C to 22°C (Fig. 4A). Growth of DRorrAS at 30°C is comparable to that of  
163 WT (Ehira *et al.*, 2014), but its growth at 22°C was slower than that of WT (Fig. 4B). Thus, OrrA  
164 also influences cold acclimation.

165

166 *anaKa is a determinant of dehydration tolerance*

167 To further reveal the mechanisms of dehydration tolerance, the involvement of genes regulated by  
168 OrrA in dehydration tolerance was investigated. We focused on *anaK* because this gene is highly  
169 expressed in akinetes (Zhou and Wolk, 2002), which are cells that are extremely resistant to  
170 stresses such as cold and desiccation (Adams and Duggan, 1999). Four *anaK* paralogs, namely  
171 *anaKa*, *anaKb*, *anaKc*, and *anaKd*, were induced by dehydration, and this induction depended on  
172 OrrA (Table S1). Each *anaK* paralog was inactivated, and the growth of the disruptants after  
173 dehydration was determined (Fig. 5). The *anaKa* disruptant DRanaKaK could not grow after  
174 incubation on the filters for 24 h, whereas the other *anaK* disruptants retained similar growth  
175 ability as WT (Fig. 5A). Time-course experiments illustrated that DRanaKaK lost growth ability  
176 at 8 h (Fig. 5B), when water had completely evaporated from filters (Fig. 3A). This indicated that  
177 *anaKa* disruption has a fatal effect on survival under dehydration.

178 Disruption of *anaKa* alone resulted in the loss of dehydration tolerance. To examine

179 the involvement of other genes regulated by OrrA in dehydration tolerance, damage of DRorrAS  
180 and DRanaKaK cell after dehydration was evaluated by quantifying phycocyanin excretion from  
181 cells (Fig. 6). Phycocyanin is a water-soluble pigment protein and is released extracellularly upon  
182 cell lysis (Arii *et al.*, 2015). In WT, phycocyanin excretion was not enhanced by dehydration. In  
183 DRorrAS and DRanaKaK, excreted phycocyanin levels were comparable to WT levels before  
184 dehydration, but phycocyanin excretion was increased by dehydration. Phycocyanin excretion  
185 was more than twofold higher in DRorrAS than DRanaKaK, indicating greater cell membrane  
186 damage in DRorrAS. Thus, the *orrA* disruption is more detrimental than the *anaKa* disruption.

187

## 188 **DISCUSSION**

189 In this study, we revealed that the two-component response regulator OrrA played principal roles  
190 in the regulation of dehydration response and tolerance in *Anabaena*. *orrA* disruption abolished or  
191 diminished the induction of approximately 400 genes by dehydration (Fig.1 and Table S1). As  
192 previously indicated in response to salt stress (Ehira *et al.*, 2014), OrrA regulated sucrose  
193 synthesis under dehydration conditions (Table 1). In addition, the trehalose synthesis genes *mtb*  
194 and *mts*, which encode maltooligosyl trehalose hydrolase and maltooligosyl trehalose synthase,  
195 respectively, were regulated by OrrA (Table S1). Because disruption of *mtb* and *mts* results in  
196 decreased dehydration tolerance (Higo *et al.*, 2006), the depression of compatible solutes  
197 synthesis partly accounts for the susceptibility of the *orrA* disruptant to dehydration. In the OrrA  
198 regulon identified this study, *anaKa* was indispensable for dehydration tolerance in *Anabaena*  
199 (Fig. 5). *anaKa* encodes a protein of unknown function with a PRC-barrel domain at its  
200 N-terminus and a DUF2382 domain at its C-terminus. Although *anaKb*, *anaKc*, and *anaKd* were  
201 also induced by dehydration in an OrrA-dependent manner, their disruption did not affect  
202 dehydration tolerance. *anaKa* was more strongly induced than the other examined *anaK* genes  
203 (Fig. 2, Table S1). Differences in expression levels of AnaK proteins could explain the different  
204 phenotypes among the *anaK* mutants. OrrA and AnaK homologs are present in the genome of the



205 terrestrial cyanobacteria, such as *Nostoc* sp. HK-01, *N. flagelliforme*, and *Chroococcidiopsis*  
206 *thermalis* PCC 7203. OrrA and AnaK homologs are highly expressed in desiccated samples in *N.*  
207 *flagelliforme* (Shang *et al.*, 2019), and an AnaK homolog is induced by dehydration in *Nostoc* sp.  
208 HK-01 (Yoshimura *et al.*, 2006), suggesting their conserved functions in desiccation tolerance.

209           The function of the PRC-barrel domain is unknown. It is found in the H subunit of  
210 photosystem reaction center (PRC) of the purple bacteria (Anantharaman and Aravind, 2002).  
211 The H subunit of PRC is necessary for functional PRC assembly, and it regulates electron transfer  
212 in PRC (Takahashi and Wraight, 1996; Lupo and Ghosh, 2004). The PRC-barrel domain is also  
213 found at the C-terminus of RimM, which is involved in RNA processing and ribosome assembly  
214 (Anantharaman and Aravind, 2002). The PRC-barrel domain of AnaKa is phylogenetically most  
215 closely related to that of the H subunit of PRC (Anantharaman and Aravind, 2002). AnaKa  
216 homologs are present in the highly radiation- and desiccation-resistant bacterium *Deinococcus*  
217 *radiodurans* and some species of the genus *Psychrobacter*, which are psychro- and osmo-tolerant  
218 bacteria (Kim *et al.*, 2012). In *D. radiodurans*, the expression of the *anaKa* homolog DR1314 is  
219 upregulated by heat shock, and its induction is regulated by the extracytoplasmic function sigma  
220 factor Sig1 (Schmid *et al.*, 2005). DR1314 is also regulated by the response regulator DrRRA,  
221 which is essential for radioresistance in *D. radiodurans* (Wang *et al.*, 2016). The DR1314  
222 disruptant is sensitive to hydrogen peroxide (H<sub>2</sub>O<sub>2</sub>) exposure and heat shock (Schmid *et al.*,  
223 2005; Wang *et al.*, 2016). Thus, AnaK homologs play important roles in the stress resistance of  
224 extremophiles.

225           It was also indicated that OrrA regulates ROS defense systems (Table 2). ROS, which  
226 include singlet oxygen (<sup>1</sup>O<sub>2</sub>), superoxide anion (O<sub>2</sub><sup>-</sup>), H<sub>2</sub>O<sub>2</sub>, and hydroxyl radical (•OH), is the  
227 main damaging factor during dehydration (Singh, 2018). O<sub>2</sub><sup>-</sup>, which is generated by the reduction  
228 of oxygen through photosynthetic electron transport, is detoxified by superoxide dismutase  
229 (SOD), which dismutates it into H<sub>2</sub>O<sub>2</sub> and O<sub>2</sub> with. In *Anabaena*, *sodA* and *sodB* both encode  
230 SOD (Li *et al.*, 2002), but their expression was not upregulated by dehydration. H<sub>2</sub>O<sub>2</sub> is removed

231 by catalases and peroxiredoxin (Prxs), which convert it into water. The catalase genes *katA* and  
232 *katB* were induced by dehydration; however, catalase activity is low in *Anabaena*, and Prxs play a  
233 more prominent role in H<sub>2</sub>O<sub>2</sub> removal (Pascual *et al.*, 2010). Although alr4641 (encoding  
234 2-Cys-Prx), the overexpression of which protects *Anabaena* cells from oxidative stress (Banerjee  
235 *et al.*, 2015), is induced by O<sub>2</sub><sup>-</sup> and H<sub>2</sub>O<sub>2</sub> (Hurtado-Gallego *et al.*, 2019), its expression was  
236 altered by dehydration. •OH is formed by the reaction of Fe<sup>2+</sup> and H<sub>2</sub>O<sub>2</sub>, and Dps proteins  
237 sequester iron to prevent •OH formation (Howe *et al.*, 2018). *Anabaena* carries four *dps* genes  
238 (all0458, all1173, alr3808, and all4145), and all0458 and all1173 were induced by dehydration.  
239 Thus, some H<sub>2</sub>O<sub>2</sub>-detoxifying enzymes were upregulated during dehydration, but H<sub>2</sub>O<sub>2</sub>  
240 generation during dehydration is obscure because H<sub>2</sub>O<sub>2</sub>-responsive genes such as alr4641 and  
241 *trxA2* were not induced (Ehira and Ohmori, 2012; Hurtado-Gallego *et al.*, 2019). Conversely,  
242 many genes encoding proteins involved in defense against <sup>1</sup>O<sub>2</sub> were induced by dehydration  
243 (Table 2). Excited chlorophylls can transfer excitation energy to oxygen, resulting in <sup>1</sup>O<sub>2</sub>  
244 formation (Latifi *et al.*, 2009). High-light-inducible proteins, which are encoded by the *hli/scp*  
245 genes, prevent <sup>1</sup>O<sub>2</sub> formation by consuming the excess of PSII-generated electrons (Sinha *et al.*,  
246 2012). Orange carotenoid protein (OCP) is an efficient quencher of <sup>1</sup>O<sub>2</sub> (Sedoud *et al.*, 2014).  
247 Recent findings indicated that All3221 and Alr4783 proteins of *Anabaena*, which are homologous  
248 to the N-terminal domain (NTD) of OCP, are effective quenchers of <sup>1</sup>O<sub>2</sub> (López-Igual *et al.*, 2016).  
249 Moreover, in *N. flagelliforme*, a remarkable desiccation-tolerant terrestrial cyanobacterium,  
250 NTD-OCP proteins accumulated in cells collected from dried fields, suggesting its involvement  
251 in desiccation tolerance (Yang *et al.*, 2019). AstaP, another OCP, was originally found in a green  
252 alga isolated from the dried surface of heated asphalt in midsummer, and it also displays <sup>1</sup>O<sub>2</sub>  
253 quenching activity (Kawasaki *et al.*, 2013). *Anabaena* carries four genes encoding AstaP  
254 homologs (alr1819, all4647, all4894, and all5264), all of which were induced by dehydration. It  
255 is suggested that *N. commune* deactivates photosynthetic machinery in response to dehydration to  
256 protect photosystems from <sup>1</sup>O<sub>2</sub> generated through the imbalance between chlorophyll excitation

257 and photosynthetic electron transport (Hirai *et al.*, 2004). Thus, defense systems against  $^1\text{O}_2$  are  
258 especially important in dehydration tolerance of *Anabaena*.

259           The OrrA regulon defined in this study contains a huge number of genes. A  
260 transcriptional network is likely to be involved in the dehydration response, because eight genes  
261 encoding transcriptional regulators, including *sigB2* (Ehira *et al.*, 2014), were upregulated by  
262 dehydration under the control of OrrA (Table S1). In addition, the expression of more than 10  
263 genes encoding signal transduction proteins, such as sensor histidine kinase (Hik) and Ser/The  
264 kinases, increased in an OrrA-dependent manner. These regulators constitute a regulatory  
265 network of the dehydration response of *Anabaena*.

266           OrrA was identified as a master regulator of the response to salt stress and dehydration  
267 and was involved in the response to low temperature (Figs. 1 and 4). OrrA was originally  
268 identified as the regulator of *lti2* in response to salt and osmotic response (Schwartz *et al.*, 1998),  
269 implying that OrrA also plays an important role in the osmotic stress response. Evaporation of  
270 water from the medium surrounding cells increases external solute concentrations, resulting in  
271 salt and osmotic stresses. Therefore, a common signaling pathway could activate OrrA in  
272 response to dehydration, salt, and osmotic stresses. Because OrrA is a response regulator, its  
273 activity is regulated through the phosphorylation by a Hik. Three Hiks are located upstream of  
274 *orrA* in the genome of *Anabaena* (Ehira *et al.*, 2014). These Hiks are involved in dehydration  
275 response, but none of them is a cognate Hik for OrrA in *Anabaena* (K. Shimonaka & S. Ehira,  
276 unpublished data). Identification of a cognate Hik for OrrA would reveal the mechanisms by  
277 which dehydration signals are sensed.

278

## 279 **EXPERIMENTAL PROCEDURES**

280 *Bacterial strains and culture conditions*—*Anabaena* sp. strain PCC 7120 and its derivatives were  
281 grown at 30°C under continuous illumination provided by a fluorescent lamp at 30  $\mu\text{E m}^{-2} \text{s}^{-1}$  in  
282 the nitrogen-free modified Detmer's medium (MDM<sub>0</sub>) (Watanabe, 1960). Liquid cultures were

283 bubbled with air containing 1% (v/v) CO<sub>2</sub>. Salt stress conditions were generated by adding 50  
284 mM NaCl to cultures in the late-logarithmic phase (optical density at 750 nm [OD<sub>750</sub>] = 0.5-0.7).  
285 Dehydration stress was imposed on *Anabaena* cells as described previously (Higo *et al.*, 2006). A  
286 25-ml portion of cultures in the late-logarithmic phase was filtered through 47-mm, 0.45- $\mu$ m pore  
287 size mixed cellulose ester filters (Tokyo Roshi Kaisha, Tokyo, Japan) and dried for the indicated  
288 times at 30°C under continuous illumination provided by a fluorescent lamp at 10  $\mu$ E m<sup>-2</sup> s<sup>-1</sup> in a  
289 Petri dish.

290 *Mutant construction*– All primers used in this study (Table S2) were designed based on genome  
291 data from CyanoBase (Fujisawa *et al.*, 2017). DRorrAS was used as an *orrA* disruptant in this  
292 study (Ehira *et al.*, 2014). DRanaKaK, DRanaKbK, DRanaKcS, and DRanaKdS, in which *anaKa*  
293 (*all4050*), *anaKb* (*all5315*), *anaKc* (*all4051*), and *anaKd* (*alr5332*), respectively, were disrupted,  
294 were constructed by replacing each gene with an antibiotic-resistant gene in the same manner as  
295 performed for DRorrAS using primer pairs specific for each gene (Ehira *et al.*, 2014).

296 *DNA microarray analysis*– Total RNA was extracted from whole filaments according to Pinto *et al.*  
297 al. (Pinto *et al.*, 2009) and was treated with DNase I (Takara Bio, Shiga, Japan). Global gene  
298 expression was analyzed using the *Anabaena* oligonucleotide microarray as described previously  
299 (Ehira and Ohmori, 2006). Microarray analyses were conducted using three sets of RNA samples  
300 isolated from independently grown cultures. Two hybridization reactions were performed with  
301 different combination of Cy-dyes for each set of RNA samples. Thus, six replicates were  
302 available per gene to determine changes in gene expression. Genes with at least twofold  
303 differences in transcript levels ( $P < 0.05$ ; Student's *t*-test) were identified. The microarray data  
304 were deposited in the KEGG Expression Database (accession numbers ex0001979 to  
305 ex0002002).

306 *qRT-PCR*– cDNAs were synthesized from 1  $\mu$ g of total RNA with random hexamer primers using  
307 a PrimeScript first strand cDNA synthesis kit (Takara Bio). qRT-PCR was performed using the  
308 Thermal Cycler Dice Real Time System II (TP900; Takara Bio) in a 20- $\mu$ l reaction mixture

309 containing 10  $\mu$ l of THUNDERBIRD SYBR qPCR Mix (Toyobo, Osaka, Japan), 0.2  $\mu$ M each of  
310 gene-specific forward and reverse primers, and cDNA. Relative transcript levels were normalized  
311 to the value for 16S rRNA and represented as means of duplicate measurements. Experiments  
312 were repeated at least three times.

313 *Dehydration tolerance assay*– Cells dehydrated for the indicated times on filter paper were  
314 suspended in MDM<sub>0</sub>. The suspended cultures were diluted with MDM<sub>0</sub> to OD<sub>750</sub> of 0.1 and  
315 incubated at 30°C at 10  $\mu$ E m<sup>-2</sup> s<sup>-1</sup>. After 72 h, OD<sub>750</sub> of the cultures was measured.

316 *Determination of sucrose contents*– The low-molecular-mass compounds of cells dehydrated for  
317 the indicated time were extracted with 80% ethanol for 3 h at 65°C (Higo *et al.*, 2006). After  
318 centrifugation, supernatants were vacuum-dried, and the residue was dissolved in 0.5 ml of water.  
319 The samples were treated with 3 U of invertase (Sigma) in 50 mM sodium acetate (pH 4.5) for 2 h  
320 at 37°C, and the concentration of released glucose was determined using a Glucose Assay Kit  
321 (Biovision). The chlorophyll *a* content of cultures was determined as described previously  
322 (Mackinney, 1941).

323 *Quantification of excreted phycobiliproteins*– Dehydrated cells were resuspended in MDM<sub>0</sub> and  
324 statically incubated for 5 min at room temperature. Cells were collected by centrifugation, and the  
325 absorbance of the supernatants at 620 nm was measured. A<sub>620</sub> was normalized by OD<sub>750</sub> measured  
326 prior to centrifugation.

327

## 328 **Acknowledgments**

329 This work was supported by the Japan Society for the Promotion of Science (JSPS) [Challenging  
330 Research Exploratory 19K22290], and a grant from the Noda Institute of Scientific Research to  
331 SE.

332

## 333 **Author contributions**

334 M. Ohmori and S. Ehira conceived the study. S. Kimura and S. Ehira designed the experiments. S.

335 Kimura, M. Sato, X. Fan, and S. Ehira conducted the experiments and analyzed the data. S. Ehira  
336 wrote the manuscript, and all authors edited and approved the final manuscript.

337

338 **Conflict of Interest**

339 The authors declare that they have no conflicts of interest.

340

341 **References**

- 342 Adams, D.G., and Duggan, P.S. (1999) Heterocyst and akinete differentiation in cyanobacteria.  
343 *New Phytol* **144**: 3–33.
- 344 Anantharaman, V., and Aravind, L. (2002) The PRC-barrel: a widespread, conserved domain  
345 shared by photosynthetic reaction center subunits and proteins of RNA metabolism. *Genome*  
346 *Biol* **3**: 1–9.
- 347 Aarii, S., Tsuji, K., Tomita, K., Hasegawa, M., Bober, B., and Harada, K.I. (2015) Cyanobacterial  
348 blue color formation during lysis under natural conditions. *Appl Environ Microbiol* **81**:  
349 2667–2675.
- 350 Banerjee, M., Chakravarty, D., and Ballal, A. (2015) Redox-dependent chaperone/peroxidase  
351 function of 2-Cys-Prx from the cyanobacterium *Anabaena* PCC7120: role in oxidative stress  
352 tolerance. *BMC Plant Biol* **15**: 60.
- 353 Billi, D., Wright, D.J., Potts, M., Helm, R.F., Crowe, J.H., and Prickett, T. (2002) Engineering  
354 desiccation tolerance in *Escherichia coli*. *Appl Environ Microbiol* **66**: 1680–1684.
- 355 Daly, M.J. (2009) A new perspective on radiation resistance based on *Deinococcus radiodurans*.  
356 *Nat Rev Microbiol* **7**: 237–245.
- 357 Ehira, S., Kimura, S., Miyazaki, S., and Ohmori, M. (2014) Sucrose synthesis in the  
358 nitrogen-fixing cyanobacterium *Anabaena* sp. strain PCC 7120 is controlled by the  
359 two-component response regulator OrrA. *Appl Environ Microbiol* **80**: 5672–5679.
- 360 Ehira, S., and Ohmori, M. (2006) NrrA, a nitrogen-responsive response regulator facilitates  
361 heterocyst development in the cyanobacterium *Anabaena* sp. strain PCC 7120. *Mol Microbiol*  
362 **59**: 1692–1703.
- 363 Ehira, S., and Ohmori, M. (2012) The redox-sensing transcriptional regulator RexT controls  
364 expression of thioredoxin A2 in the cyanobacterium *Anabaena* sp. strain PCC 7120. *J Biol*  
365 *Chem* **287**: 40433–40440.
- 366 Ehira, S., Ohmori, M., and Sato, N. (2005) Identification of low-temperature-regulated ORFs in

367 the cyanobacterium *Anabaena* sp. strain PCC 7120: distinguishing the effects of low  
368 temperature from the effects of photosystem II excitation pressure. *Plant Cell Physiol* **46**:  
369 1237–1245.

370 Fagliarone, C., Mosca, C., Ubaldi, I., Verseux, C., Baqué, M., Wilmotte, A., and Billi, D. (2017)  
371 Avoidance of protein oxidation correlates with the desiccation and radiation resistance of hot  
372 and cold desert strains of the cyanobacterium *Chroococciopsis*. *Extremophiles* **21**: 981–991.

373 Flores, E., Picossi, S., Valladares, A., and Herrero, A. (2019) Transcriptional regulation of  
374 development in heterocyst-forming cyanobacteria. *Biochim Biophys Acta Gene Regul Mech*  
375 **1862**: 673–684.

376 França, M.B., Panek, A.D., and Eleutherio, E.C. (2007) Oxidative stress and its effects during  
377 dehydration. *Comp Biochem Physiol A Mol Integr Physiol* **146**: 621–631.

378 Fredrickson, J.K., Li, S.M., Gaidamakova, E.K., Matrosova, V.Y., Zhai, M., Sulloway, H.M., *et*  
379 *al.* (2008) Protein oxidation: key to bacterial desiccation resistance? *ISME J* **2**: 393–403.

380 Fujisawa, T., Narikawa, R., Maeda, S.I., Watanabe, S., Kanesaki, Y.Y., Kobayashi, K., *et al.*  
381 (2017) CyanoBase: a large-scale update on its 20th anniversary. *Nucleic Acids Res* **45**:  
382 D551–D554.

383 Hershkovitz, N., Oren, A., and Cohen, Y. (1991) Accumulation of trehalose and sucrose in  
384 cyanobacteria exposed to matric water stress. *Appl Environ Microbiol* **57**: 645–648.

385 Higo, A., Katoh, H., Ohmori, K., Ikeuchi, M., and Ohmori, M. (2006) The role of a gene cluster  
386 for trehalose metabolism in dehydration tolerance of the filamentous cyanobacterium *Anabaena*  
387 sp. PCC 7120. *Microbiology* **152**: 979–987.

388 Hirai, M., Yamakawa, R., Nishio, J., Yamaji, T., Kashino, Y., Koike, H., and Satoh, K. (2004)  
389 Deactivation of photosynthetic activities is triggered by loss of a small amount of water in a  
390 desiccation-tolerant cyanobacterium, *Nostoc commune*. *Plant Cell Physiol* **45**: 872–878.

391 Howe, C., Ho, F., Nenninger, A., Raleiras, P., and Stensjö, K. (2018) Differential biochemical  
392 properties of three canonical Dps proteins from the cyanobacterium *Nostoc punctiforme* suggest



- 393 distinct cellular functions. *J Biol Chem* **293**: 16635–16646.
- 394 Hurtado-Gallego, J., Redondo-López, A., Leganés, F., Rosal, R., and Fernández-Piñas, F. (2019)
- 395 Peroxiredoxin (*2-cys-prx*) and catalase (*kataA*) cyanobacterial-based bioluminescent bioreporters
- 396 to detect oxidative stress in the aquatic environment. *Chemosphere* **236**: 124395.
- 397 Katoh, H., Shiga, Y., Nakahira, Y., and Ohmori, M. (2003) Isolation and characterization of a
- 398 drought-tolerant cyanobacterium, *Nostoc* sp. HK-01. *Microbes Environ* **18**: 82–88.
- 399 Kawasaki, S., Mizuguchi, K., Sato, M., Kono, T., and Shimizu, H. (2013) A novel
- 400 astaxanthin-binding photooxidative stress-inducible aqueous carotenoprotein from a eukaryotic
- 401 microalga isolated from asphalt in midsummer. *Plant Cell Physiol* **54**: 1027–1040.
- 402 Kim, S.J., Shin, S.C., Hong, S.G., Lee, Y.M., Choi, I.G., and Park, H. (2012) Genome sequence of
- 403 a novel member of the genus *Psychrobacter* isolated from Antarctic soil. *J Bacteriol* **194**:
- 404 2403–2403.
- 405 Latifi, A., Ruiz, M., and Zhang, C.C. (2009) Oxidative stress in cyanobacteria. *FEMS Microbiol*
- 406 *Rev* **33**: 258–278.
- 407 Li, T., Huang, X., Zhou, R., Liu, Y., Li, B., Nomura, C., and Zhao, J. (2002) Differential
- 408 expression and localization of Mn and Fe superoxide dismutases in the heterocystous
- 409 cyanobacterium *Anabaena* sp. strain PCC 7120. *J Bacteriol* **184**: 5096–5103.
- 410 Lipman, C.B. (1941) The successful revival of *Nostoc commune* from a herbarium specimen
- 411 eighty- seven years old. *Bull Torrey Bot Club* **68**: 664.
- 412 López-Igual, R., Wilson, A., Leverenz, R.L., Melnicki, M.R., Bourcier de Carbon, C., Sutter, M.,
- 413 *et al.* (2016) Different functions of the paralogs to the N-terminal domain of the orange
- 414 carotenoid protein in the cyanobacterium *Anabaena* sp. PCC 7120. *Plant Physiol* **171**:
- 415 1852–1866.
- 416 Lupo, D., and Ghosh, R. (2004) The reaction center H subunit is not required for high levels of
- 417 light-harvesting complex 1 in *Rhodospirillum rubrum* mutants. *J Bacteriol* **186**: 5585–5595.
- 418 Mackinney, G. (1941) Absorption of light by chlorophyll solutions. *J Biol Chem* **140**: 315–322.

- 419 Ohmori, M., Ikeuchi, M., Sato, N., Wolk, P., Kaneko, T., Ogawa, T., *et al.* (2001)  
420 Characterization of genes encoding multi-domain proteins in the genome of the filamentous  
421 nitrogen-fixing cyanobacterium *Anabaena* sp. strain PCC 7120. *DNA Res* **8**: 271–284.
- 422 Pascual, M.B., Mata-Cabana, A., Florencio, F.J., Lindahl, M., and Cejudo, F.J. (2010)  
423 Overoxidation of 2-Cys peroxiredoxin in prokaryotes: cyanobacterial 2-Cys peroxiredoxins  
424 sensitive to oxidative stress. *J Biol Chem* **285**: 34485–34492.
- 425 Pinto, F.L., Thapper, A., Sontheim, W., and Lindblad, P. (2009) Analysis of current and  
426 alternative phenol based RNA extraction methodologies for cyanobacteria. *BMC Mol Biol* **10**:  
427 79.
- 428 Pointing, S.B., and Belnap, J. (2012) Microbial colonization and controls in dryland systems. *Nat*  
429 *Rev Microbiol* **10**: 551–562.
- 430 Potts, M. (2001) Desiccation tolerance: a simple process? *Trends Microbiol* **9**: 553–559.
- 431 Sakamoto, T., Yoshida, T., Arima, H., Hatanaka, Y., Takani, Y., and Tamaru, Y. (2009)  
432 Accumulation of trehalose in response to desiccation and salt stress in the terrestrial  
433 cyanobacterium *Nostoc commune*. *Phycol Res* **57**: 66–73.
- 434 Schmid, A.K., Howell, H.A., Battista, J.R., Peterson, S.N., and Lidstrom, M.E. (2005) Global  
435 transcriptional and proteomic analysis of the Sig1 heat shock regulon of *Deinococcus*  
436 *radiodurans*. *J Bacteriol* **187**: 3339–3351.
- 437 Schwartz, S.H., Black, T.A., Jäger, K., Panoff, J.M., and Wolk, C.P. (1998) Regulation of an  
438 osmoticum-responsive gene in *Anabaena* sp. strain PCC 7120. *J Bacteriol* **180**: 6332–6337.
- 439 Sedoud, A., López-Igual, R., Ur Rehman, A., Wilson, A., Perreau, F., Boulay, C., *et al.* (2014)  
440 The cyanobacterial photoactive orange carotenoid protein is an excellent singlet oxygen  
441 quencher. *Plant Cell* **26**: 1781–1791.
- 442 Shang, J.L., Chen, M., Hou, S., Li, T., Yang, Y.W., Li, Q., *et al.* (2019) Genomic and  
443 transcriptomic insights into the survival of the subaerial cyanobacterium *Nostoc flagelliforme* in  
444 arid and exposed habitats. *Environ Microbiol* **21**: 845–863.

- 445 Singh, H. (2018) Desiccation and radiation stress tolerance in cyanobacteria. *J Basic Microbiol*  
446 **58**: 813–826.
- 447 Singh, H., Anurag, K., and Apte, S.K. (2013) High radiation and desiccation tolerance of  
448 nitrogen-fixing cultures of the cyanobacterium *Anabaena* sp. strain PCC 7120 emanates from  
449 genome/proteome repair capabilities. *Photosynth Res*.
- 450 Sinha, R.K., Komenda, J., Knoppová, J., Sedlářová, M., and Pospíšil, P. (2012) Small CAB-like  
451 proteins prevent formation of singlet oxygen in the damaged photosystem II complex of the  
452 cyanobacterium *Synechocystis* sp. PCC 6803. *Plant Cell Environ* **35**: 806–818.
- 453 Takahashi, E., and Wraight, C.A. (1996) Potentiation of proton transfer function by electrostatic  
454 interactions in photosynthetic reaction centers from *Rhodobacter sphaeroides*: first results from  
455 site-directed mutation of the H subunit. *Proc Natl Acad Sci U S A* **93**: 2640–2645.
- 456 Tamaru, Y., Takani, Y., Yoshida, T., and Sakamoto, T. (2005) Crucial role of extracellular  
457 polysaccharides in desiccation and freezing tolerance in the terrestrial cyanobacterium *Nostoc*  
458 *commune*. *Appl Environ Microbiol* **71**: 7327–7333.
- 459 Tapia, H., and Koshland, D.E. (2014) Trehalose is a versatile and long-lived chaperone for  
460 desiccation tolerance. *Curr Biol* **24**: 2758–2766.
- 461 Tibiletti, T., Rehman, A.U., Vass, I., and Funk, C. (2018) The stress-induced SCP/HLIP family of  
462 small light-harvesting-like proteins (ScpABCDE) protects photosystem II from photoinhibitory  
463 damages in the cyanobacterium *Synechocystis* sp. PCC 6803. *Photosynth Res* **135**: 103–114.
- 464 Wang, L., Hu, J., Liu, M., Yang, S., Zhao, Y., Cheng, K., *et al.* (2016) Proteomic insights into the  
465 functional basis for the response regulator DrRRA of *Deinococcus radiodurans*. *Int J Radiat*  
466 *Biol* **92**: 273–280.
- 467 Wang, L., Sun, Y.P., Chen, W.L., Li, J.H., and Zhang, C.C. (2002) Genomic analysis of protein  
468 kinases, protein phosphatases and two-component regulatory systems of the cyanobacterium  
469 *Anabaena* sp. strain PCC 7120. *FEMS Microbiol Lett* **217**: 155–165.
- 470 Watanabe, A. (1960) List of algal strains in collection at the Institute of Applied Microbiology,

- 471 University of Tokyo. *J Gen Appl Microbiol* **6**: 283–292.
- 472 Xu, H.F., Dai, G.Z., Ye, D.M., Shang, J.L., Song, W.Y., Shi, H., and Qiu, B.S. (2020)
- 473 Dehydration-induced DnaK2 chaperone is involved in PSII repair of a desiccation-tolerant
- 474 cyanobacterium. *Plant Physiol* **182**: 1991–2005.
- 475 Yang, Y.W., Yin, Y.C., Li, Z.K., Huang, D., Shang, J.L., Chen, M., and Qiu, B.S. (2019) Orange
- 476 and red carotenoid proteins are involved in the adaptation of the terrestrial cyanobacterium
- 477 *Nostoc flagelliforme* to desiccation. *Photosynth Res* **140**: 103–113.
- 478 Yoshimura, H., Ikeuchi, M., and Ohmori, M. (2006) Up-regulated gene expression during
- 479 dehydration in a terrestrial cyanobacterium, *Nostoc* sp. strain HK-01. *Microbes Environ* **21**:
- 480 129–133.
- 481 Yoshimura, H., Okamoto, S., Tsumuraya, Y., and Ohmori, M. (2007) Group 3 sigma factor gene,
- 482 *sigJ*, a key regulator of desiccation tolerance, regulates the synthesis of extracellular
- 483 polysaccharide in cyanobacterium *Anabaena* sp. strain PCC 7120. *DNA Res* **14**: 13–24.
- 484 Zhou, R., and Wolk, C.P. (2002) Identification of an akinete marker gene in *Anabaena variabilis*.
- 485 *J Bacteriol* **184**: 2529–2532.
- 486
- 487

488 Table 1. Sucrose contents after dehydration

| Strain  | Sucrose ( $\mu\text{mol/ mg chl}a$ ) |                 |
|---------|--------------------------------------|-----------------|
|         | 0 h                                  | 9 h             |
| WT      | $0.06 \pm 0.06$                      | $5.00 \pm 0.39$ |
| DRorrAS | $0.04 \pm 0.04$                      | $2.26 \pm 0.29$ |

489 WT, wild-type *Anabaena* sp. strain PCC 7120; DRorrAS, *orrA* mutant *Anabaena* sp. strain PCC

490 7120; *chl*a, chlorophyll *a*

491

492

493 Table 2. OrrA-regulated genes that are related to ROS defense

| ORF No.                                       | Product                                     |
|-----------------------------------------------|---------------------------------------------|
| Defense against H <sub>2</sub> O <sub>2</sub> |                                             |
| alr0998 ( <i>katA</i> )                       | Fe catalase                                 |
| alr3090 ( <i>katB</i> )                       | Mn catalase                                 |
| all0458 ( <i>dps</i> )                        | Dps                                         |
| all1173 ( <i>dps</i> )                        | Dps                                         |
| Defense against <sup>1</sup> O <sub>2</sub>   |                                             |
| asl0514 ( <i>hli/scp</i> )                    | High-light-inducible/small CAB-like protein |
| asl0873 ( <i>hli/scp</i> )                    | High-light-inducible/small CAB-like protein |
| asr3042 ( <i>hli/scp</i> )                    | High-light-inducible/small CAB-like protein |
| asr3043 ( <i>hli/scp</i> )                    | High-light-inducible/small CAB-like protein |
| all3221                                       | Homolog of the N-terminal domain of OCP     |
| alr4783                                       | Homolog of the N-terminal domain of OCP     |
| alr1819                                       | AstaP                                       |
| all4647                                       | AstaP                                       |
| all4894                                       | AstaP                                       |
| all5264                                       | AstaP                                       |

494 ROS, reactive oxygen species; ORF, open-reading frame; H<sub>2</sub>O<sub>2</sub>, hydrogen peroxide; <sup>1</sup>O<sub>2</sub>, singlet

495 oxygen; OCP, orange carotenoid protein

496

497 **Figure legends**

498 **Fig 1.** Venn diagrams of genes upregulated by salt stress and dehydration in wild-type *Anabaena*  
499 sp. strain PCC 7120 (WT) and the *orrA* disruptant DRorrAS. The numbers in parenthesis indicate  
500 genes upregulated in both WT and DRorrAS.

501

502 **Fig 2.** Temporal changes in the transcript levels of genes upregulated by salt stress. The transcript  
503 levels of *mth* (A), *dps* (B), and *anaK* (C) after the addition of 50 mM NaCl were determined by  
504 qRT-PCR in WT (black circles) and the *orrA* disruptant (white circles). The transcript levels were  
505 determined in duplicated measurements using three independently grown cultures. The transcript  
506 level at 0 min in WT was taken as 1. Data are presented as the mean  $\pm$  SD.

507

508 **Fig 3.** Dehydration tolerance of the *orrA* disruptant.

509 A. Changes in weight of filters during 24h of incubation. Filaments of WT (black circles) and the  
510 *orrA* disruptant (white circles) were collected on filters and the filters dried for 24 h. The weight  
511 of each filter was measured during the 24-h incubation and presented as a ratio to the control (0 h).  
512 B. Growth ability of the *orrA* disruptant after dehydration. Filaments on the filters were  
513 resuspended in liquid medium at the indicated time, the optical density at 750 nm ( $OD_{750}$ ) of the  
514 suspension was adjusted to 0.1, and then filaments were incubated for 3 days in liquid medium.  
515  $OD_{750}$  after the 3-day incubation was indicated for WT (black circles) and the *orrA* disruptant  
516 (white circles). The experiments were repeated using three independently grown cultures. Data  
517 are presented as the mean  $\pm$  SD.

518

519 **Fig 4.** Involvement of OrrA in cold acclimation.

520 A. Changes in the *orrA* transcript levels after a shift to low temperature (22°C). The transcript  
521 level at 0 h was taken as 1.

522 B. Growth of WT (black circles) and the *orrA* disruptant (white circles) at 22°C. Growth was

523 monitored by measuring OD<sub>750</sub>. The experiments were repeated with three independently grown  
524 cultures. Data are presented as the mean  $\pm$  SD.

525

526 **Fig 5.** Dehydration tolerance of disruptants of the *anaK* genes. Filaments of disruptants of *anaKa*  
527 ( $\Delta$ Ka), *anaKb* ( $\Delta$ Kb), *anaKc* ( $\Delta$ Kc), *anaKd* ( $\Delta$ Kd), and *orrA* ( $\Delta$ orrA) were subjected to  
528 dehydration for 0 (white bars) or 24 h (gray bars), and then their growth ability was evaluated as  
529 described in Fig 3 (A). Temporal changes of the growth ability of WT (black circles) and the  
530 *anaKa* disruptant (white circles) during 24 h of incubation were determined (B). The experiments  
531 were repeated using three independently grown cultures. Data are presented as the mean  $\pm$  SD.

532

533 **Fig 6.** Excretion of phycocyanin after dehydration. Phycocyanin excreted in the medium from the  
534 cells of WT (black bars), the *orrA* disruptant (gray bars), and the *anaKa* disruptant (white bars)  
535 that were dehydrated on filters for 0 or 24 h was determined by measuring the absorbance at 620  
536 nm.

537



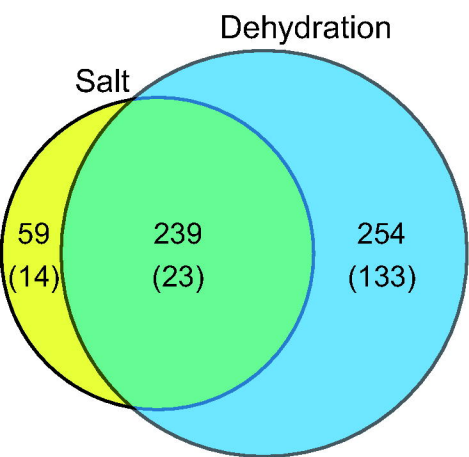

Fig. 1

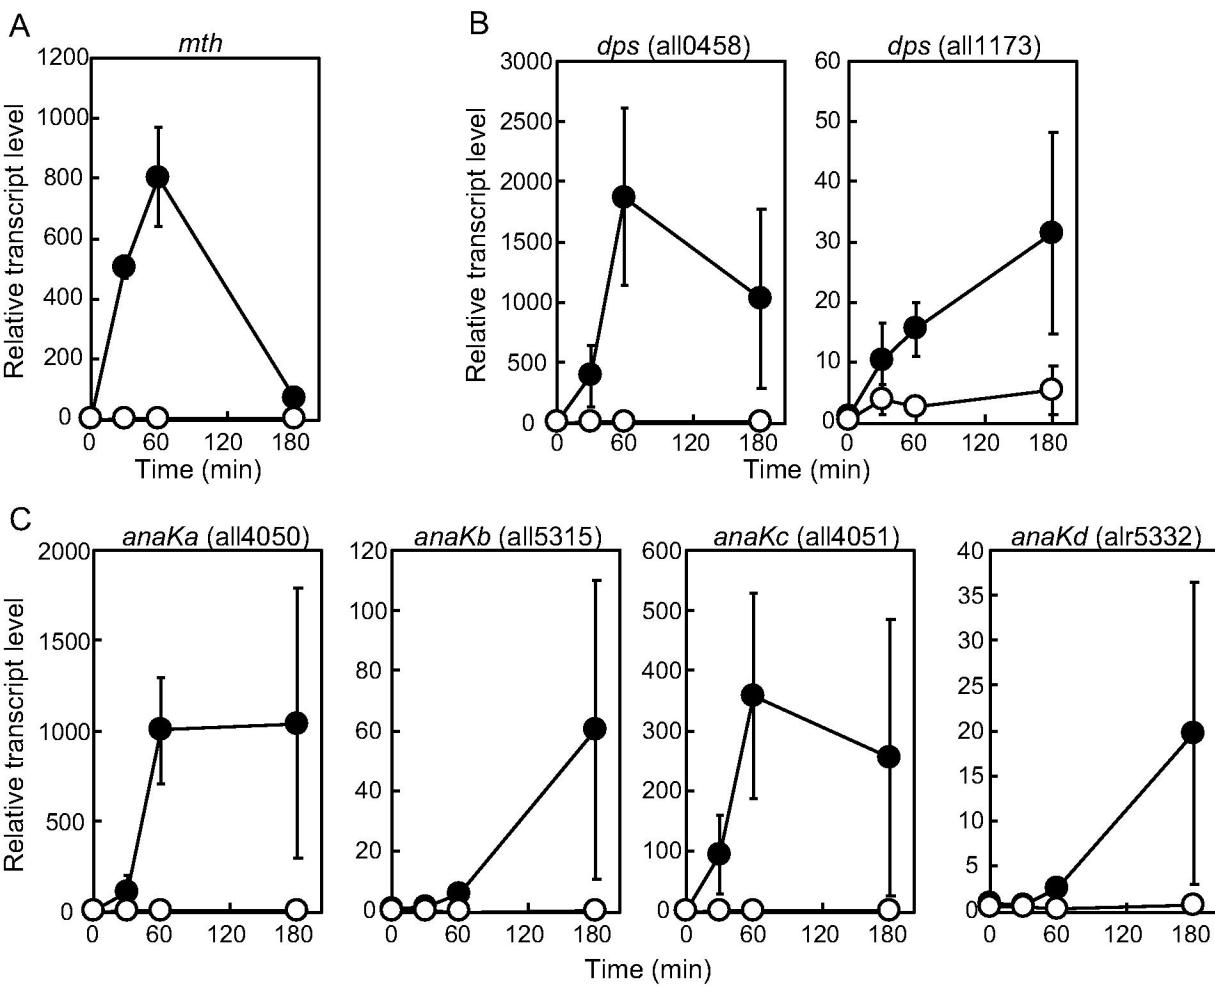

Fig. 2

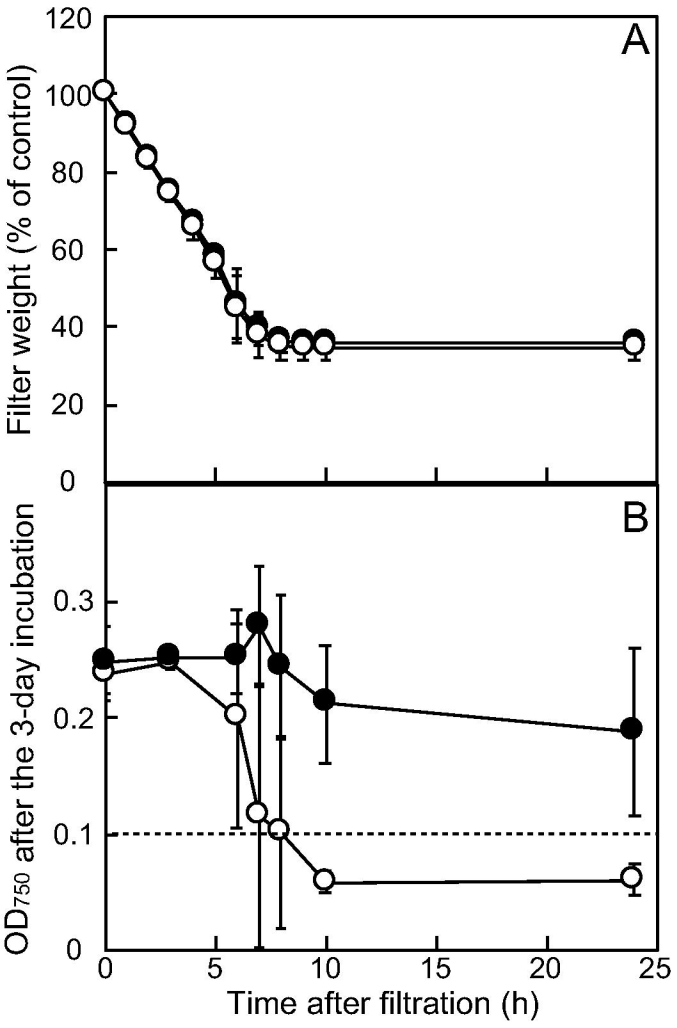

Fig. 3

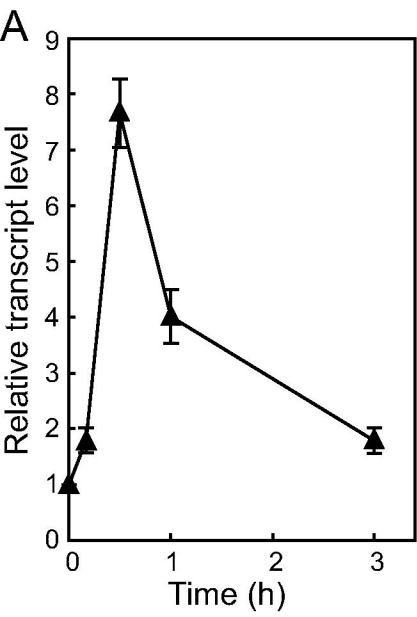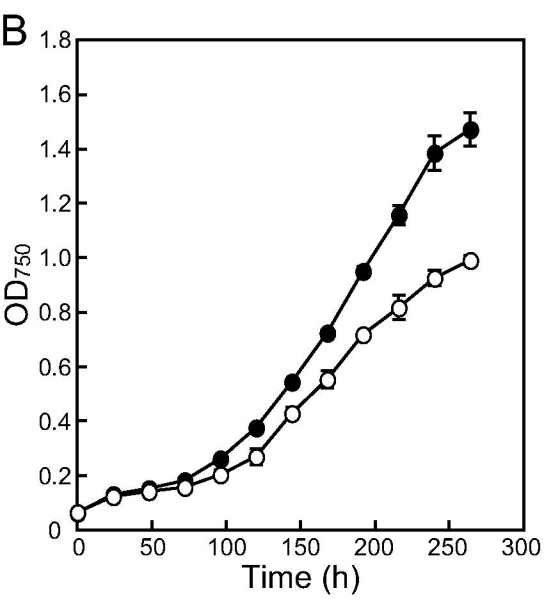

Fig. 4

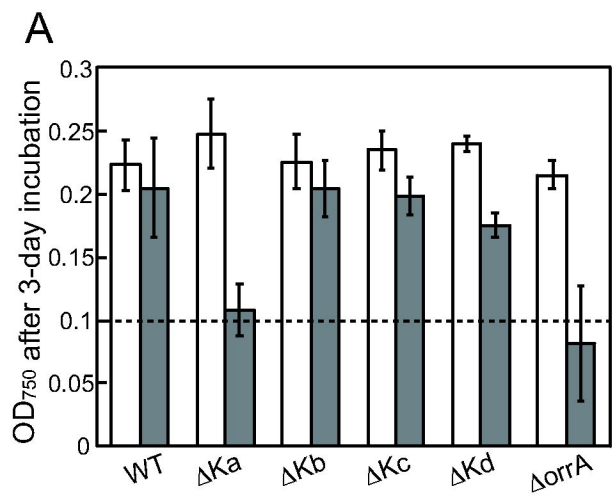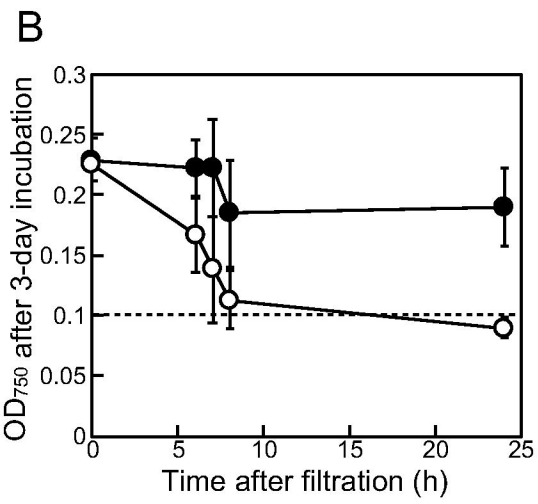

Fig. 5

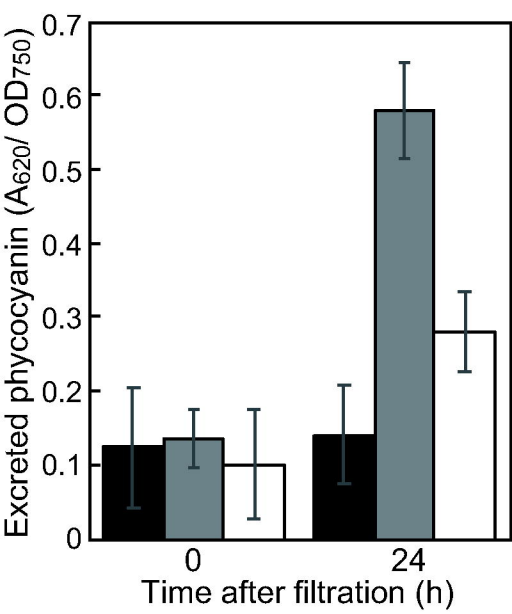

Fig. 6
